# Supplementary material for: Stereoselective analysis of the chiral fungicide penflufen in wheat plants, spinach, and Chinese cabbage
Source: Royal Society of Chemistry journal article supplement (doi:10.1039/c8ra10455g), 2019-01-01
Supplement: c8ra10455g1.pdf [file c8ra10455g1.pdf]

**Table S1 Physical and chemical properties of penflufen**

---

|                                        |      |
|----------------------------------------|------|
| Solubility - In water at 20°C (mg/L)   | 10.9 |
| Soil degradation (days) DT50 (typical) | 192  |
| Aqueous photolysis DT50 (days) at pH 7 | 17.3 |
| Water-sediment DT50 (days)             | 21   |
| Water phase only DT50 (days)           | 246  |
| Log KOW                                | 3.3  |

---

**Table S2 Gradient elution procedure**

| Time (min) | A: 0.1% aqueous formic acid | B: acetonitrile |
|------------|-----------------------------|-----------------|
| 0          | 15%                         | 85%             |
| 20         | 15%                         | 85%             |
| 25         | 65%                         | 35%             |
| 55         | 65%                         | 35%             |
| 60         | 15%                         | 85%             |

**Table S3 Mass spectrometry conditions of target compounds in MRM mode**

| Compound  | Ion source | Parent ion | Product ion | Q1 collision voltage (V) | Collision energy (V) | Q3 collision voltage (V) |
|-----------|------------|------------|-------------|--------------------------|----------------------|--------------------------|
| Penflufen | ESI+       | 318.10     | 234.05*     | -26.0                    | -15.0                | -30.0                    |
|           |            |            | 141.05      | -26.0                    | -30.0                | -26.0                    |
